# Supplementary material for: The Evolution of the Glacier Surges in the Tuanjie Peak, the Qilian Mountains
Source: MDPI journal article supplement (doi:10.3390/rs14040852), 2022-02-11
Supplement: s1 [file s1]

# Supplementary Materials

**Table S1** Landsat 5 TM (LT05), Landsat 7 ETM+ (LE07), Landsat 8 OLI (LC08), ASTER (AST) and Sentinel-2 (S2) scenes used to produce the annual velocity maps. Scene pair dates (DD/MM/YYYY) is also listed. Bias and uncertainty metrics for the magnitude components of the velocity are listed. MED is mean surface velocity difference in stable terrain area, STDV is standard deviation. The spatial autocorrelation distance (D) is 2400 m. The resolution (PS) of the interannual velocity is 120 m.

| Annual velocity                |                           |                                           |                                      |                                |                           |                                           |                                   |
|--------------------------------|---------------------------|-------------------------------------------|--------------------------------------|--------------------------------|---------------------------|-------------------------------------------|-----------------------------------|
| Velocity date pair information |                           |                                           |                                      | Velocity date pair information |                           |                                           |                                   |
| Sat.                           | Date                      | MED $\pm$<br>STDV (m<br>a <sup>-1</sup> ) | $e_{off}$<br>(m<br>a <sup>-1</sup> ) | Sat.                           | Date                      | MED $\pm$<br>STDV<br>(m a <sup>-1</sup> ) | $e_{off}$<br>(m a <sup>-1</sup> ) |
| LT05                           | 25/07/1986–<br>30/09/1987 | 2.51 $\pm$ 1.32                           | 2.51                                 | LT05                           | 10/09/2003–<br>27/08/2004 | 1.61 $\pm$ 1.14                           | 1.61                              |
| LT05                           | 30/09/1987–<br>28/06/1988 | 4.40 $\pm$ 4.87                           | 4.42                                 | LT05                           | 27/08/2004–<br>13/07/2005 | 5.62 $\pm$ 1.67                           | 5.62                              |
| LT05                           | 28/06/1988–<br>19/09/1989 | 2.99 $\pm$ 3.28                           | 3.00                                 | LT05                           | 13/07/2005–<br>01/08/2006 | 2.32 $\pm$ 0.89                           | 2.32                              |
| LT05                           | 19/09/1989–<br>21/08/1990 | 2.11 $\pm$ 1.16                           | 2.11                                 | LT05                           | 01/08/2006–<br>01/06/2007 | 1.92 $\pm$ 1.13                           | 1.92                              |
| LT05                           | 21/08/1990–<br>07/07/1991 | 2.30 $\pm$ 1.23                           | 2.30                                 | LT05                           | 01/06/2007–<br>22/08/2008 | 1.64 $\pm$ 1.05                           | 1.64                              |
| LT05                           | 07/07/1991–<br>26/08/1992 | 5.10 $\pm$ 6.47                           | 5.13                                 | LT05                           | 22/08/2008–<br>09/08/2009 | 1.72 $\pm$ 1.07                           | 1.72                              |
| LT05                           | 26/08/1992–<br>19/12/1993 | 6.58 $\pm$ 9.70                           | 6.63                                 | LT05                           | 09/08/2009–<br>13/09/2010 | 4.92 $\pm$ 6.23                           | 4.95                              |
| LT05                           | 19/12/1993–<br>17/09/1994 | 2.77 $\pm$ 1.70                           | 2.77                                 | LT05                           | 13/09/2010–<br>31/08/2011 | 4.45 $\pm$ 6.03                           | 4.48                              |
| LT05                           | 17/09/1994–<br>04/09/1995 | 6.54 $\pm$ 3.16                           | 6.55                                 | AST                            | 28/04/2012–<br>06/04/2013 | 3.46 $\pm$ 1.41                           | 3.46                              |
| LT05                           | 04/09/1995–<br>22/09/1996 | 4.07 $\pm$ 3.87                           | 4.08                                 | LC08                           | 19/07/2013–<br>08/09/2014 | 1.53 $\pm$ 0.58                           | 1.53                              |
| LT05                           | 22/09/1996–<br>25/09/1997 | 3.37 $\pm$ 1.27                           | 3.37                                 | LC08                           | 08/09/2014–<br>10/08/2015 | 2.11 $\pm$ 0.68                           | 2.11                              |
| LT05                           | 25/09/1997–<br>28/09/1998 | 3.46 $\pm$ 1.38                           | 3.46                                 | LC08                           | 10/08/2015–<br>13/09/2016 | 1.23 $\pm$ 1.04                           | 1.23                              |
| LT05                           | 28/09/1998–<br>15/09/1999 | 2.53 $\pm$ 1.61                           | 2.53                                 | LC08                           | 13/09/2016–<br>15/08/2017 | 1.63 $\pm$ 1.45                           | 1.63                              |
| LE07                           | 23/09/1999–<br>08/08/2000 | 5.64 $\pm$ 1.83                           | 5.64                                 | LC08                           | 15/08/2017–<br>05/10/2018 | 1.95 $\pm$ 1.19                           | 1.95                              |
| LE07                           | 08/08/2000–<br>24/06/2001 | 3.33 $\pm$ 2.82                           | 3.34                                 | S2                             | 22/08/2018–<br>26/09/2019 | 4.54 $\pm$ 0.58                           | 4.54                              |
| LE07                           | 24/06/2001–<br>14/08/2002 | 1.02 $\pm$ 1.48                           | 1.03                                 | S2                             | 26/09/2019–<br>25/09/2020 | 4.62 $\pm$ 0.43                           | 4.62                              |

|      |                           |             |      |
|------|---------------------------|-------------|------|
| LT05 | 22/08/2002–<br>10/09/2003 | 1.91 ± 1.31 | 1.91 |
|------|---------------------------|-------------|------|

**Table S2** Landsat 8 OLI (LC08) and Sentinel-2 (S2) scenes used to produce the seasonal velocity maps. Scene pair dates (DD/MM/YYYY) is also listed. Bias and uncertainty metrics for the magnitude components of the velocity are listed. MED is mean surface velocity difference in stable terrain area, STDV is standard deviation. The spatial autocorrelation distance (D) is 600 m. The resolution (PS) of the interannual velocity is 30 m.

| Seasonal velocity              |                       |                                       |                                   |                                |                       |                                       |                                   |
|--------------------------------|-----------------------|---------------------------------------|-----------------------------------|--------------------------------|-----------------------|---------------------------------------|-----------------------------------|
| Velocity date pair information |                       |                                       |                                   | Velocity date pair information |                       |                                       |                                   |
| Sat.                           | Date                  | MED ±<br>STDV (m<br>d <sup>-1</sup> ) | $e_{off}$<br>(m d <sup>-1</sup> ) | Sa<br>t.                       | Date                  | MED ±<br>STDV (m<br>d <sup>-1</sup> ) | $e_{off}$<br>(m d <sup>-1</sup> ) |
| LC08                           | 14/04/2013–01/06/2013 | 0.09 ± 0.05                           | 0.09                              | S2                             | 06/09/2018–16/09/2018 | 0.32 ± 0.31                           | 0.32                              |
| LC08                           | 01/06/2013–19/07/2013 | 0.07 ± 0.05                           | 0.07                              | S2                             | 16/09/2018–06/10/2018 | 0.37 ± 0.11                           | 0.37                              |
| LC08                           | 19/07/2013–07/10/2013 | 0.05 ± 0.04                           | 0.05                              | S2                             | 06/10/2018–11/10/2018 | 2.56 ± 0.15                           | 2.56                              |
| LC08                           | 07/10/2013–23/10/2013 | 0.51 ± 0.41                           | 0.51                              | S2                             | 11/10/2018–16/10/2018 | 2.01 ± 0.52                           | 2.01                              |
| LC08                           | 23/10/2013–26/12/2013 | 0.05 ± 0.04                           | 0.05                              | S2                             | 16/10/2018–26/10/2018 | 0.35 ± 0.16                           | 0.35                              |
| LC08                           | 26/12/2013–11/01/2014 | 0.29 ± 0.18                           | 0.29                              | S2                             | 26/10/2018–10/11/2018 | 0.69 ± 0.22                           | 0.69                              |
| LC08                           | 11/01/2014–16/03/2014 | 0.13 ± 0.09                           | 0.13                              | S2                             | 10/11/2018–25/11/2018 | 0.56 ± 0.10                           | 0.56                              |
| LC08                           | 16/03/2014–03/05/2014 | 0.11 ± 0.07                           | 0.11                              | S2                             | 25/11/2018–10/12/2018 | 0.74 ± 0.08                           | 0.74                              |
| LC08                           | 03/05/2014–19/05/2014 | 0.32 ± 0.23                           | 0.32                              | S2                             | 10/12/2018–15/12/2018 | 1.41 ± 0.18                           | 1.41                              |
| LC08                           | 19/05/2014–04/06/2014 | 0.48 ± 0.37                           | 0.48                              | S2                             | 15/12/2018–30/12/2018 | 0.64 ± 0.06                           | 0.64                              |
| LC08                           | 04/06/2014–23/08/2014 | 0.05 ± 0.03                           | 0.05                              | S2                             | 30/12/2018–14/01/2019 | 0.71 ± 0.08                           | 0.71                              |
| LC08                           | 23/08/2014–08/09/2014 | 0.16 ± 0.06                           | 0.16                              | S2                             | 14/01/2019–24/01/2019 | 0.18 ± 0.12                           | 0.18                              |
| LC08                           | 08/09/2014–27/11/2014 | 0.17 ± 0.08                           | 0.17                              | S2                             | 24/01/2019–03/02/2019 | 0.16 ± 0.09                           | 0.16                              |
| LC08                           | 27/11/2014–29/12/2014 | 0.06 ± 0.03                           | 0.06                              | S2                             | 03/02/2019–18/02/2019 | 0.42 ± 0.08                           | 0.42                              |
| LC08                           | 29/12/2014–30/01/2015 | 0.04 ± 0.03                           | 0.04                              | S2                             | 18/02/2019–05/03/2019 | 0.33 ± 0.11                           | 0.33                              |
| LC08                           | 30/01/2015–15/02/2015 | 0.11 ± 0.08                           | 0.11                              | S2                             | 05/03/2019–15/03/2019 | 0.20 ± 0.04                           | 0.20                              |
| LC08                           | 15/02/2015–19/03/2015 | 0.06 ± 0.03                           | 0.06                              | S2                             | 15/03/2019–25/03/2019 | 0.33 ± 0.07                           | 0.33                              |
| LC08                           | 19/03/2015–22/05/2015 | 0.28 ± 0.49                           | 0.28                              | S2                             | 25/03/2019–09/04/2019 | 0.56 ± 0.07                           | 0.56                              |
| LC08                           | 22/05/2015–07/06/2015 | 0.43 ± 0.31                           | 0.43                              | S2                             | 09/04/2019–14/04/2019 | 1.92 ± 0.18                           | 1.92                              |
| LC08                           | 07/06/2015–25/07/2015 | 0.18 ± 0.15                           | 0.18                              | S2                             | 14/04/2019–24/05/2019 | 0.10 ± 0.15                           | 0.10                              |
| LC08                           | 25/07/2015–10/08/2015 | 0.16 ± 0.15                           | 0.16                              | S2                             | 24/05/2019–03/06/2019 | 0.23 ± 0.20                           | 0.23                              |
| LC08                           | 10/08/2015–13/10/2015 | 0.09 ± 0.06                           | 0.09                              | S2                             | 03/06/2019–28/07/2019 | 0.20 ± 0.24                           | 0.20                              |
| LC08                           | 13/10/2015–14/11/2015 | 0.49 ± 0.46                           | 0.49                              | S2                             | 28/07/2019–26/09/2019 | 0.11 ± 0.24                           | 0.11                              |
| LC08                           | 14/11/2015–16/12/2015 | 0.17 ± 0.09                           | 0.17                              | S2                             | 26/09/2019–01/10/2019 | 0.97 ± 0.52                           | 0.97                              |
| S2                             | 06/12/2015–05/01/2016 | 0.06 ± 0.03                           | 0.06                              | S2                             | 01/10/2019–26/10/2019 | 0.81 ± 0.76                           | 0.81                              |
| S2                             | 05/01/2016–04/02/2016 | 0.12 ± 0.05                           | 0.12                              | S2                             | 26/10/2019–05/11/2019 | 0.37 ± 0.09                           | 0.37                              |
| S2                             | 04/02/2016–04/04/2016 | 0.12 ± 0.04                           | 0.12                              | S2                             | 05/11/2019–20/11/2019 | 0.14 ± 0.08                           | 0.14                              |
| S2                             | 04/04/2016–13/06/2016 | 0.06 ± 0.03                           | 0.06                              | S2                             | 20/11/2019–10/12/2019 | 0.14 ± 0.05                           | 0.14                              |
| S2                             | 13/06/2016–21/09/2016 | 0.28 ± 0.58                           | 0.28                              | S2                             | 10/12/2019–20/12/2019 | 0.22 ± 0.08                           | 0.22                              |
| S2                             | 21/09/2016–11/10/2016 | 0.23 ± 0.33                           | 0.23                              | S2                             | 20/12/2019–30/12/2019 | 0.13 ± 0.09                           | 0.13                              |
| S2                             | 11/10/2016–30/11/2016 | 0.21 ± 0.34                           | 0.21                              | S2                             | 30/12/2019–19/01/2020 | 0.13 ± 0.04                           | 0.13                              |
| S2                             | 30/11/2016–10/12/2016 | 0.93 ± 0.15                           | 0.93                              | S2                             | 19/01/2020–29/01/2020 | 0.18 ± 0.05                           | 0.18                              |
| S2                             | 10/12/2016–30/12/2016 | 0.14 ± 0.05                           | 0.14                              | S2                             | 29/01/2020–03/02/2020 | 0.77 ± 0.07                           | 0.77                              |
| S2                             | 30/12/2016–19/01/2017 | 0.23 ± 0.07                           | 0.23                              | S2                             | 03/02/2020–18/02/2020 | 0.31 ± 0.07                           | 0.31                              |
| S2                             | 19/01/2017–18/02/2017 | 0.07 ± 0.04                           | 0.07                              | S2                             | 18/02/2020–28/02/2020 | 0.22 ± 0.05                           | 0.22                              |
| S2                             | 18/02/2017–10/03/2017 | 0.23 ± 0.14                           | 0.23                              | S2                             | 28/02/2020–04/03/2020 | 1.37 ± 0.08                           | 1.37                              |
| S2                             | 10/03/2017–30/03/2017 | 0.10 ± 0.07                           | 0.10                              | S2                             | 04/03/2020–09/03/2020 | 1.15 ± 0.20                           | 1.15                              |
| S2                             | 30/03/2017–09/05/2017 | 0.21 ± 0.10                           | 0.21                              | S2                             | 09/03/2020–19/03/2020 | 0.28 ± 0.11                           | 0.28                              |

|    |                       |             |      |    |                       |             |      |
|----|-----------------------|-------------|------|----|-----------------------|-------------|------|
| S2 | 09/05/2017–12/08/2017 | 0.43 ± 0.65 | 0.43 | S2 | 19/03/2020–08/04/2020 | 0.11 ± 0.04 | 0.11 |
| S2 | 12/08/2017–06/09/2017 | 0.50 ± 0.41 | 0.50 | S2 | 08/04/2020–18/04/2020 | 0.25 ± 0.13 | 0.25 |
| S2 | 06/09/2017–21/09/2017 | 0.44 ± 0.36 | 0.44 | S2 | 18/04/2020–18/05/2020 | 0.23 ± 0.31 | 0.23 |
| S2 | 21/09/2017–11/10/2017 | 0.21 ± 0.08 | 0.21 | S2 | 18/05/2020–17/06/2020 | 0.43 ± 0.51 | 0.43 |
| S2 | 11/10/2017–31/10/2017 | 0.62 ± 0.38 | 0.62 | S2 | 17/06/2020–02/07/2020 | 0.57 ± 0.59 | 0.57 |
| S2 | 31/10/2017–05/11/2017 | 0.41 ± 0.16 | 0.41 | S2 | 02/07/2020–26/08/2020 | 0.30 ± 0.50 | 0.30 |
| S2 | 05/11/2017–10/11/2017 | 0.47 ± 0.08 | 0.47 | S2 | 26/08/2020–31/08/2020 | 1.61 ± 0.44 | 1.61 |
| S2 | 10/11/2017–20/11/2017 | 0.19 ± 0.11 | 0.19 | S2 | 31/08/2020–15/09/2020 | 0.62 ± 0.27 | 0.62 |
| S2 | 20/11/2017–25/11/2017 | 0.81 ± 0.12 | 0.81 | S2 | 15/09/2020–25/09/2020 | 0.27 ± 0.04 | 0.27 |
| S2 | 25/11/2017–10/12/2017 | 0.30 ± 0.10 | 0.30 | S2 | 25/09/2020–10/10/2020 | 0.47 ± 0.04 | 0.47 |
| S2 | 10/12/2017–15/12/2017 | 1.27 ± 0.16 | 1.27 | S2 | 10/10/2020–15/10/2020 | 1.60 ± 0.07 | 1.60 |
| S2 | 15/12/2017–20/12/2017 | 1.47 ± 0.20 | 1.47 | S2 | 15/10/2020–20/10/2020 | 1.80 ± 0.07 | 1.80 |
| S2 | 20/12/2017–30/12/2017 | 0.86 ± 0.08 | 0.86 | S2 | 20/10/2020–30/10/2020 | 1.13 ± 0.46 | 1.13 |
| S2 | 30/12/2017–04/01/2018 | 0.65 ± 0.15 | 0.65 | S2 | 30/10/2020–09/11/2020 | 0.27 ± 0.21 | 0.27 |
| S2 | 04/01/2018–09/01/2018 | 0.40 ± 0.13 | 0.40 | S2 | 09/11/2020–14/11/2020 | 0.95 ± 0.17 | 0.95 |
| S2 | 09/01/2018–24/01/2018 | 0.24 ± 0.07 | 0.24 | S2 | 14/11/2020–19/11/2020 | 1.36 ± 0.61 | 1.36 |
| S2 | 24/01/2018–08/02/2018 | 0.33 ± 0.04 | 0.33 | S2 | 19/11/2020–09/12/2020 | 0.36 ± 0.24 | 0.36 |
| S2 | 08/02/2018–13/02/2018 | 0.76 ± 0.09 | 0.76 | S2 | 09/12/2020–24/12/2020 | 0.43 ± 0.06 | 0.43 |
| S2 | 13/02/2018–10/03/2018 | 0.26 ± 0.08 | 0.26 | S2 | 24/12/2020–03/01/2021 | 0.21 ± 0.09 | 0.21 |
| S2 | 10/03/2018–15/03/2018 | 1.05 ± 0.22 | 1.05 | S2 | 03/01/2021–08/01/2021 | 1.02 ± 0.09 | 1.02 |
| S2 | 15/03/2018–30/03/2018 | 0.57 ± 0.35 | 0.57 | S2 | 08/01/2021–13/01/2021 | 1.14 ± 0.08 | 1.14 |
| S2 | 30/03/2018–09/04/2018 | 0.48 ± 0.35 | 0.48 | S2 | 13/01/2021–18/01/2021 | 1.01 ± 0.45 | 1.01 |
| S2 | 09/04/2018–14/05/2018 | 0.31 ± 0.04 | 0.31 | S2 | 18/01/2021–23/01/2021 | 0.77 ± 0.14 | 0.77 |
| S2 | 14/05/2018–29/05/2018 | 0.53 ± 0.45 | 0.53 | S2 | 23/01/2021–22/02/2021 | 0.06 ± 0.04 | 0.06 |
| S2 | 29/05/2018–08/06/2018 | 0.57 ± 0.58 | 0.57 | S2 | 22/02/2021–24/03/2021 | 0.13 ± 0.10 | 0.13 |
| S2 | 08/06/2018–13/07/2018 | 0.48 ± 0.51 | 0.48 | S2 | 24/03/2021–29/03/2021 | 1.40 ± 0.61 | 1.40 |
| S2 | 13/07/2018–22/08/2018 | 0.11 ± 0.03 | 0.11 | S2 | 29/03/2021–08/05/2021 | 0.09 ± 0.06 | 0.09 |
| S2 | 22/08/2018–06/09/2018 | 0.66 ± 0.11 | 0.66 |    |                       |             |      |

---
